# Supplementary material for: Lightweight, thermally insulating, and low dielectric microcellular high-impact polystyrene (HIPS) foams fabricated by high-pressure foam injection molding with mold opening
Source: Royal Society of Chemistry journal article supplement (doi:10.1039/c8tc04248a), 2018-01-01
Supplement: c8tc04248a1.pdf [file c8tc04248a1.pdf]

### Supplementary Information

## **Lightweight, thermally insulating, and low dielectric microcellular high-impact polystyrene (HIPS) foams fabricated by high-pressure foam injection molding with mold opening**

**Guilong Wang<sup>a,\*</sup>, Guoqun Zhao<sup>a,\*</sup>, Guiwei Dong<sup>a</sup>, Libin Song<sup>a,\*</sup>, Chul B. Park<sup>b</sup>**

<sup>a</sup> Key Laboratory for Liquid-Solid Structural Evolution and Processing of Materials (Ministry of Education), Shandong University, Jinan, Shandong 250061, China

<sup>b</sup> Microcellular Plastics Manufacturing Laboratory, Department of Mechanical and Industrial Engineering, University of Toronto, Toronto, Ontario M5S 3G8, Canada

\*To whom correspondence should be addressed.

*E-mail addresses:* [guilong@sdu.edu.cn](mailto:guilong@sdu.edu.cn) (G. Wang), [zhaogq@sdu.edu.cn](mailto:zhaogq@sdu.edu.cn) (G. Zhao), and [derby@sdu.edu.cn](mailto:derby@sdu.edu.cn) (L. Song).

### **Content:**

**Fig. S1** Cellular morphology at different locations of the representative foam prepared by high-pressure foam injection molding with mold opening

**Fig. S2** Mold cavity pressure curves recorded during high-pressure foam injection molding process with different cooling time: (a) 0 s, (b) 10 s, (c) 20 s, and (d) 30 s.

**Fig. S3** SEM images of the foamed sample fabricated with cooling time of 180 s.

**Fig. S4** Recorded cavity pressure variations at location C when opening injection mold with different speed.

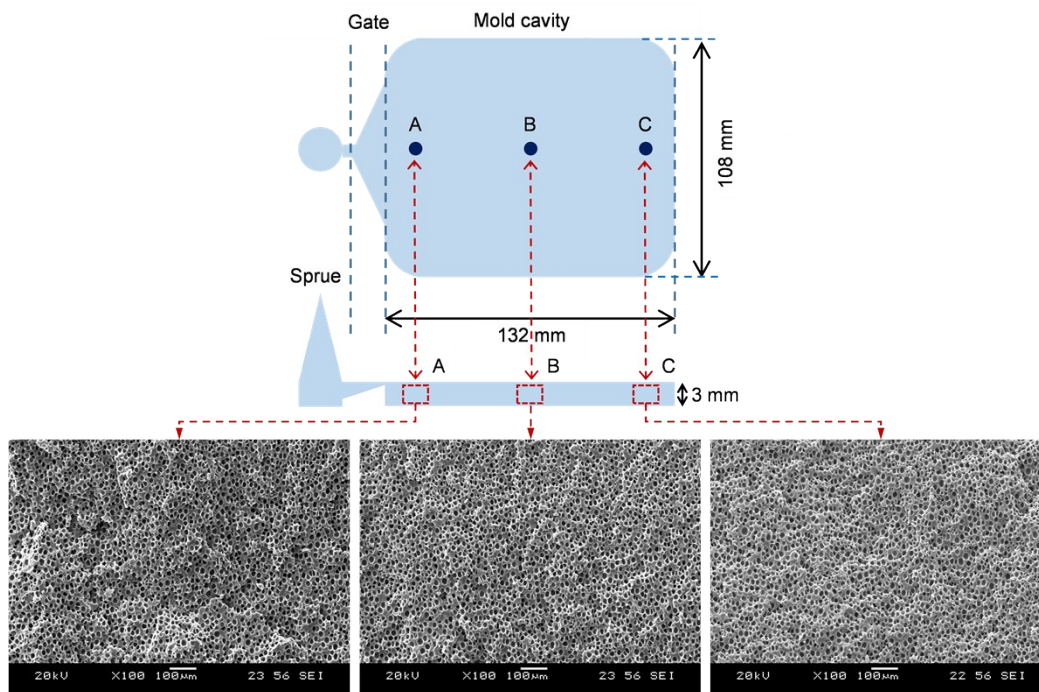

**Fig. S1** Cellular morphology at different locations of the representative foam prepared by high-pressure foam injection molding with mold opening

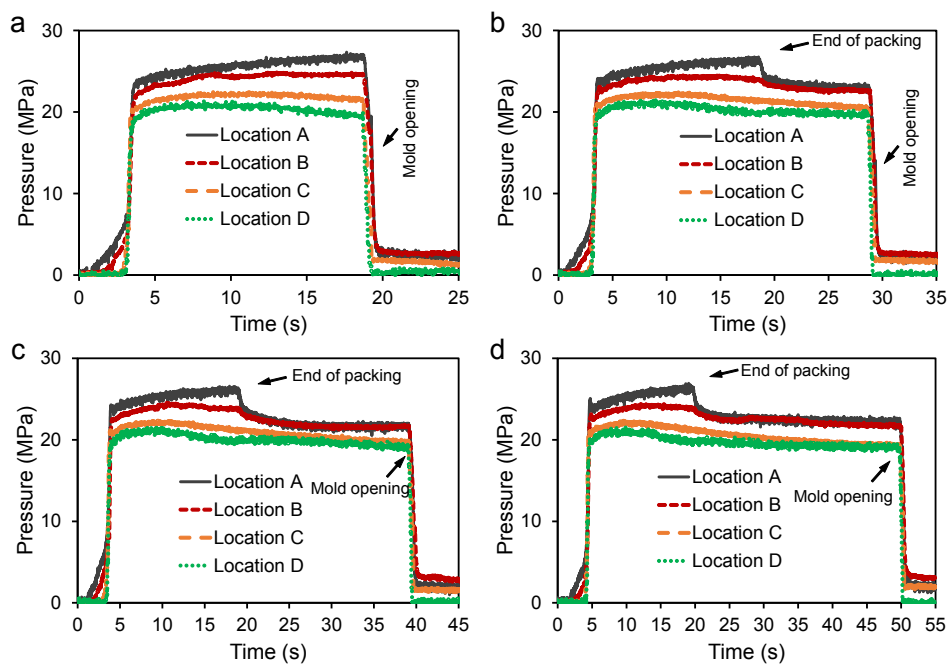

**Fig. S2** Mold cavity pressure curves recorded during high-pressure foam injection molding process with different cooling time: (a) 0 s, (b) 10 s, (c) 20 s, and (d) 30 s.

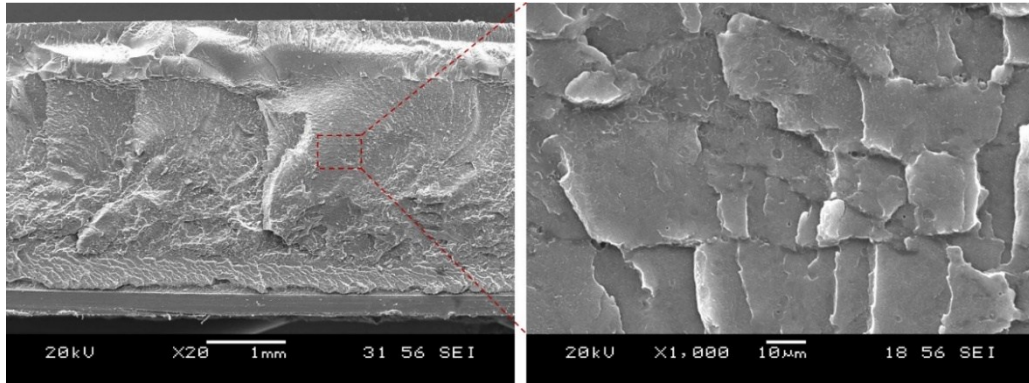

**Fig. S3** SEM images of the foamed sample fabricated with cooling time of 180 s.

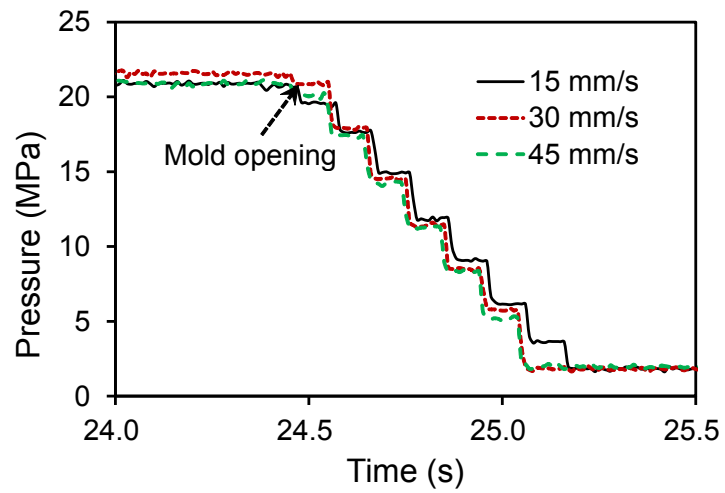

**Fig. S4** Recorded cavity pressure variations at location C when opening injection mold with different speed.
